# Supplementary material for: Association analysis of single-nucleotide polymorphism in prolactin and its receptor with productive and body conformation traits in Liaoning cashmere goats
Source: Copernicus journal article supplement (doi:10.5194/aab-65-145-2022), 2022-04-21
Supplement: Supplementary file 1 [file aab-65-145-2022-supplement.zip]

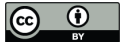

*Supplement of*

## **Association analysis of single-nucleotide polymorphism in prolactin and its receptor with productive and body conformation traits in Liaoning cashmere goats**

**Yanzhi Wu et al.**

*Correspondence to:* Zeying Wang (wangzeying2012@syau.edu.cn)

- aab-65-145-2022-supplement-title-page.pdf
- PRL .jpg
- PRLR .jpg

The copyright of individual parts of the supplement might differ from the article licence.
